# Supplementary material
Source: MDPI journal article supplement (https://www.mdpi.com/2073-4344/13/4/770)
Supplement: s1 [file s1]

Supplementary Information  
for  
**Isoselective Ring-Opening Polymerization of *rac*-Lactide Catalyzed by Simple  
Potassium Amidates Complexes Containing Polycyclic Aryl Group**

**Table of contents**

**Figure S1.**  $^1\text{H}$  NMR and  $^{13}\text{C}$  NMR spectra of **K1** (recorded in  $d_6$ -DMSO).

**Figure S2.**  $^1\text{H}$  NMR and  $^{13}\text{C}$  NMR spectra of **K2** (recorded in  $d_6$ -DMSO).

**Figure S3.**  $^1\text{H}$  NMR and  $^{13}\text{C}$  NMR spectra of **K3** (recorded in  $d_6$ -DMSO).

**Figure S4.**  $^1\text{H}$  NMR and  $^{13}\text{C}$  NMR spectra of **K4** (recorded in  $d_6$ -DMSO).

**Figure S5.**  $^1\text{H}$  NMR and  $^{13}\text{C}$  NMR spectra of **K5** (recorded in  $d_6$ -DMSO).

**Figure S6.**  $^1\text{H}$  NMR and  $^{13}\text{C}$  NMR spectra of **K6** (recorded in  $d_6$ -DMSO).

**Figure S7.**  $^1\text{H}$  NMR and  $^{13}\text{C}$  NMR spectra of **K7** (recorded in  $d_6$ -DMSO).

**Figure S8.**  $^1\text{H}$  NMR and  $^{13}\text{C}$  NMR spectra of **K8** (recorded in  $d_6$ -DMSO).

**Figure S9.**  $^1\text{H}$  NMR and  $^{13}\text{C}$  NMR spectra of **K9** (recorded in  $d_6$ -DMSO).

**Figure S10.**  $^1\text{H}$  NMR and  $^{13}\text{C}$  NMR spectra of **K10** (recorded in  $d_6$ -DMSO).

**Figure S11.** MALDI-TOF spectrum of PLA obtained by **K2** and 1 equiv. of BnOH.

**Figure S12.**  $^1\text{H}$  NMR spectra of obtained PLA by **K2** and 1 equiv. of BnOH.

**Figure S13.** MALDI-TOF spectrum of PLLA obtained by **K2** and 2 equiv. of BnOH.

**Figure S14.**  $^1\text{H}$  NMR spectra of obtained PLA by **K2** and 2 equiv. of BnOH.

**Figure S15.** MALDI-TOF spectrum of PLLA obtained by **K2** and 5 equiv. of BnOH.

**Figure S16.**  $^1\text{H}$  NMR spectra of obtained PLA by **K2** and 5 equiv. of BnOH.

**Figure S17.** Homonuclear-decoupled  $^1\text{H}$  NMR spectrum of *rac*-LA generated by **K1**.

**Figure S18.** Homonuclear-decoupled  $^1\text{H}$  NMR spectrum of *rac*-LA generated by **K2**.

**Figure S19.** Homonuclear-decoupled  $^1\text{H}$  NMR spectrum of *rac*-LA generated by **K3**.

**Figure S20.** Homonuclear-decoupled  $^1\text{H}$  NMR spectrum of *rac*-LA generated by **K4**.

**Figure S21.** Homonuclear-decoupled  $^1\text{H}$  NMR spectrum of *rac*-LA generated by **K5**.

**Figure S22.** Homonuclear-decoupled  $^1\text{H}$  NMR spectrum of *rac*-LA generated by **K6**.

**Figure S23.** Homonuclear-decoupled  $^1\text{H}$  NMR spectrum of *rac*-LA generated by **K7**.

**Figure S24.** Homonuclear-decoupled  $^1\text{H}$  NMR spectrum of *rac*-LA generated by **K8**.

**Figure S25.** Homonuclear-decoupled  $^1\text{H}$  NMR spectrum of *rac*-LA generated by **K9**.

**Figure S26.** Homonuclear-decoupled  $^1\text{H}$  NMR spectrum of *rac*-LA generated by **K10**.

**Figure S27.** Homonuclear-decoupled  $^1\text{H}$  NMR spectrum of *rac*-LA generated by **K11**.

**Figure S28.** Homonuclear-decoupled  $^1\text{H}$  NMR spectrum of *rac*-LA generated by **K2** within 10 min.

**Figure S29.** Comparing the  $T_m$  by using different catalysts (run 2, 3, 8, 10, Table 4; PLA was the polymer which catalytic with L-LA by **K2**, run 5, Table 2)

**Figure S30.** GPC curves of the PLLA produced using **K2** (runs 9, Table 2)

**Table S1.** Crystallographic data and refinement details for **K2** and **K10**

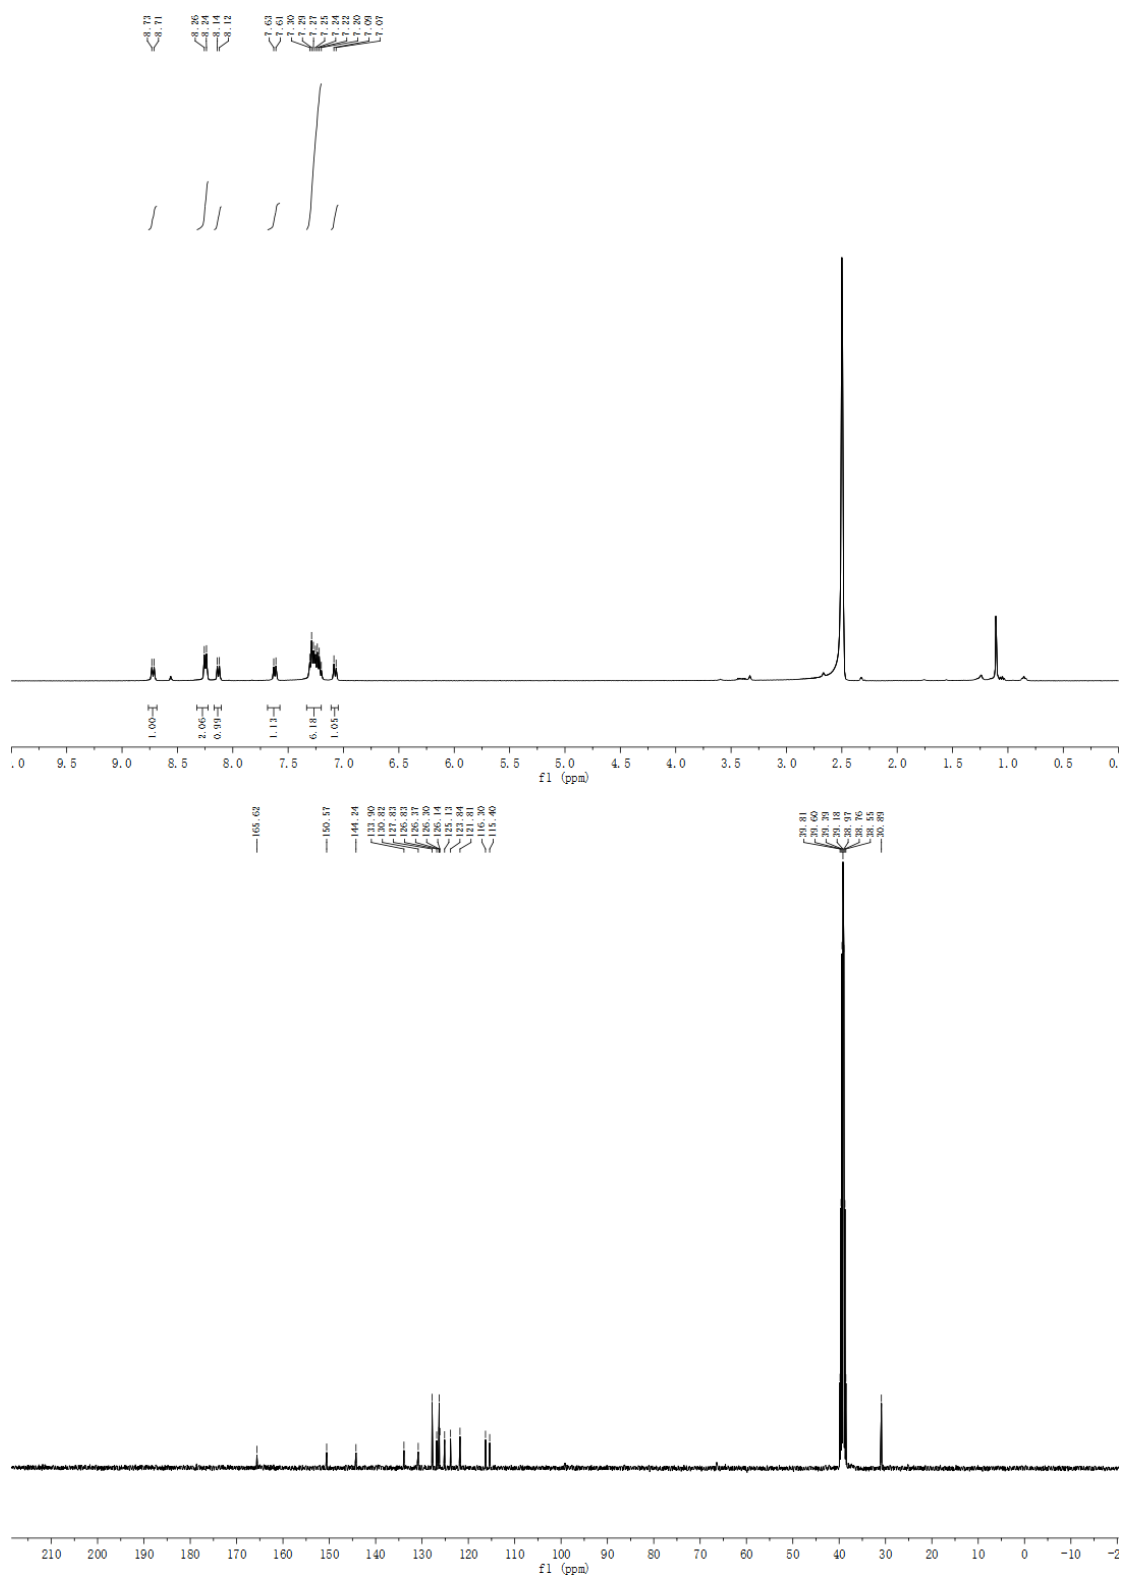

**Figure S1**  $^1\text{H}$  NMR and  $^{13}\text{C}$  NMR spectra of **K1** (recorded in  $d_6$ -DMSO).

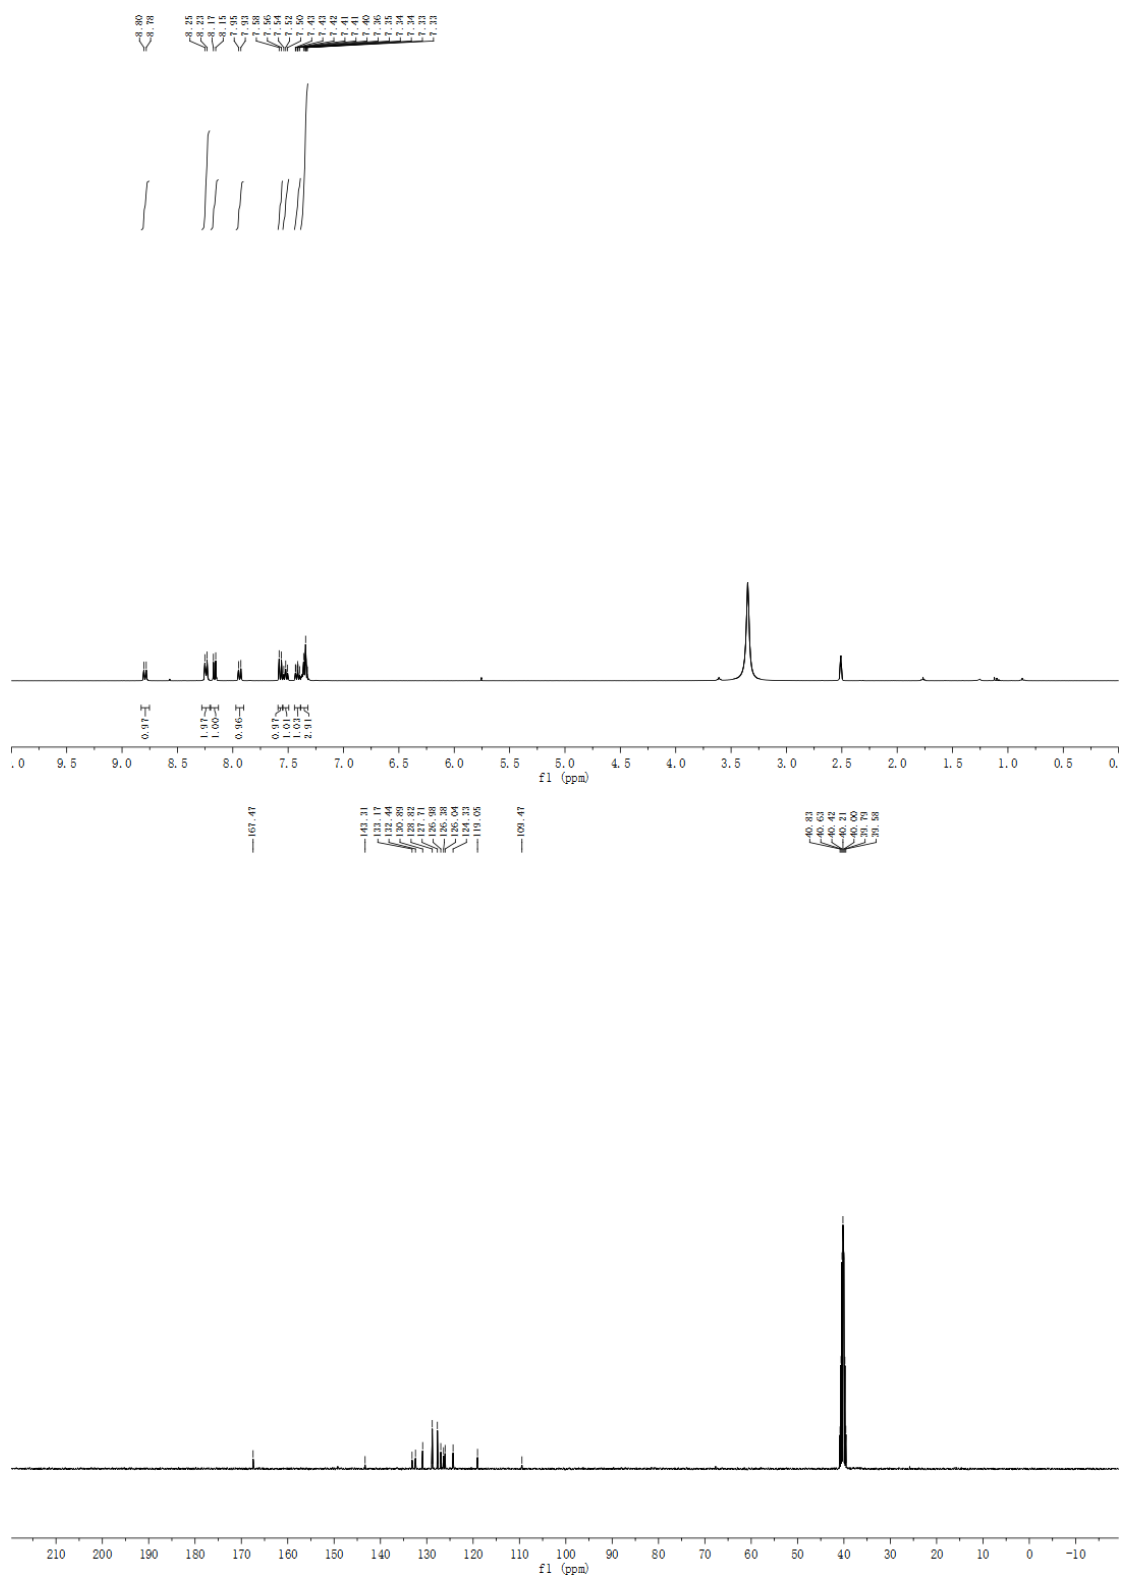

**Figure S2** <sup>1</sup>H NMR and <sup>13</sup>C NMR spectra of **K2** (recorded in *d*<sub>6</sub>-DMSO)

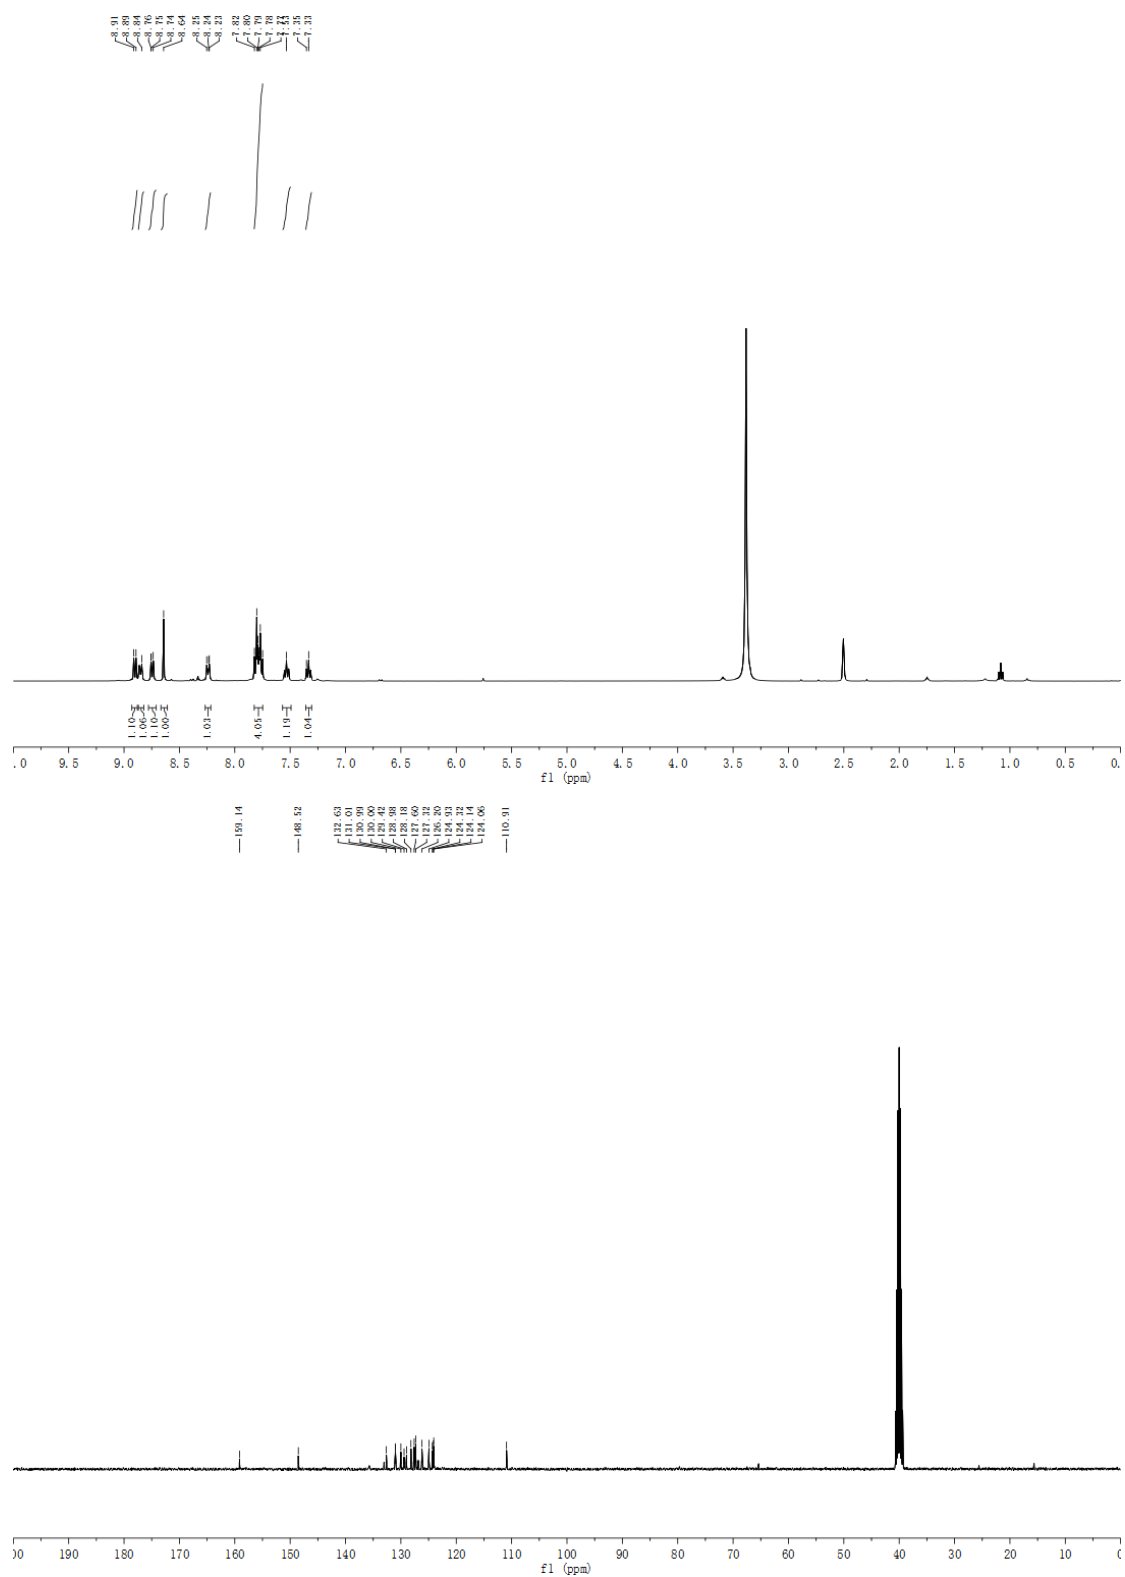

**Figure S3**  $^1\text{H}$  NMR and  $^{13}\text{C}$  NMR spectra of **K3** (recorded in  $d_6$ -DMSO)

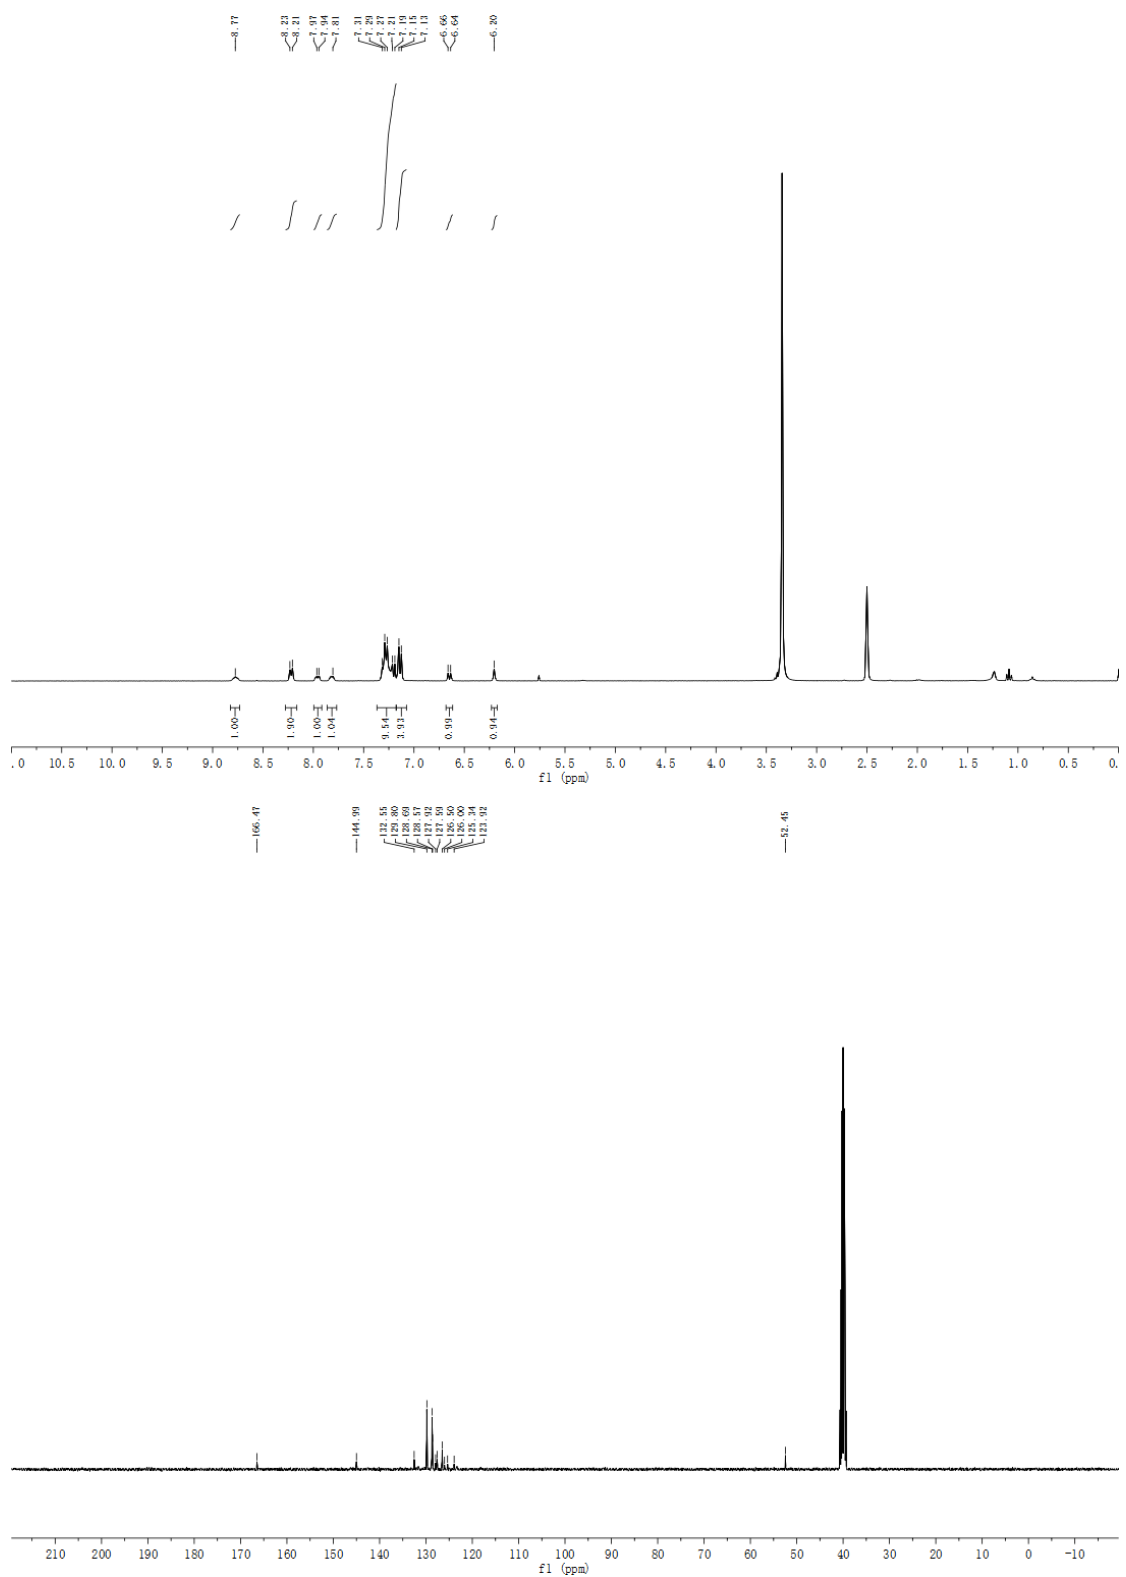

**Figure S4** <sup>1</sup>H NMR and <sup>13</sup>C NMR spectra of **K4** (recorded in *d*<sub>6</sub>-DMSO)

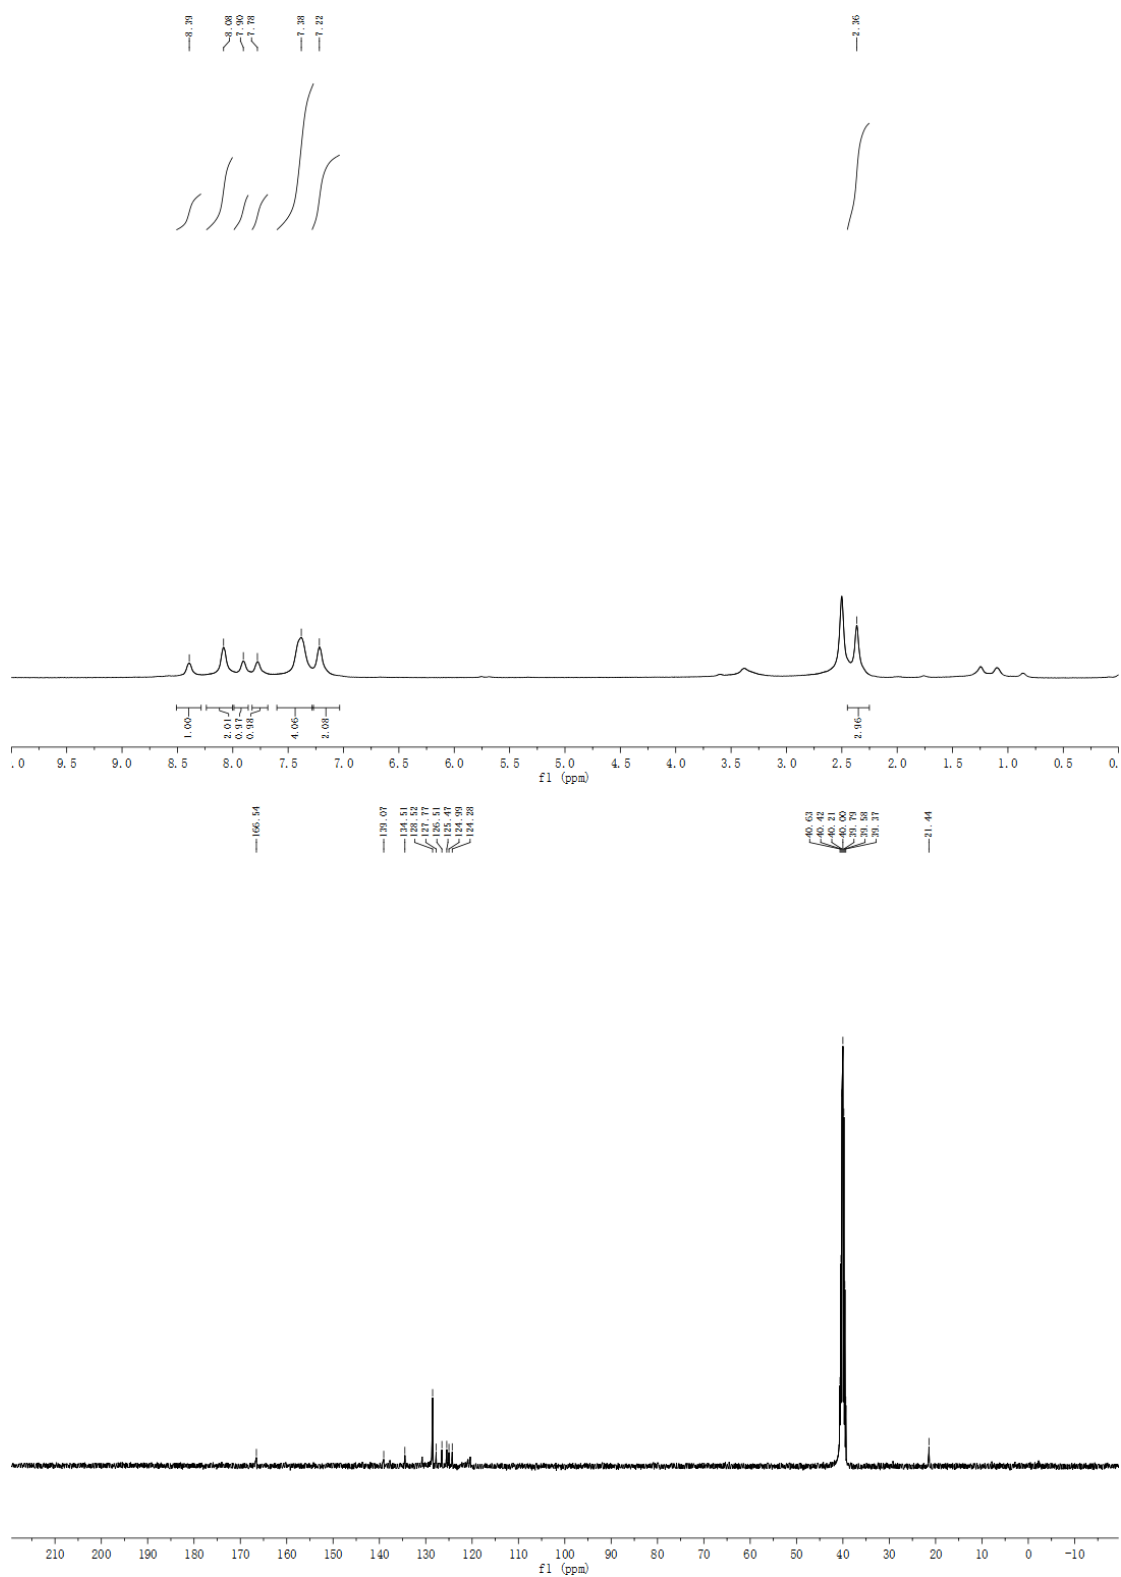

**Figure S5**  $^1\text{H}$  NMR and  $^{13}\text{C}$  NMR spectra of **K5** (recorded in  $d_6$ -DMSO)

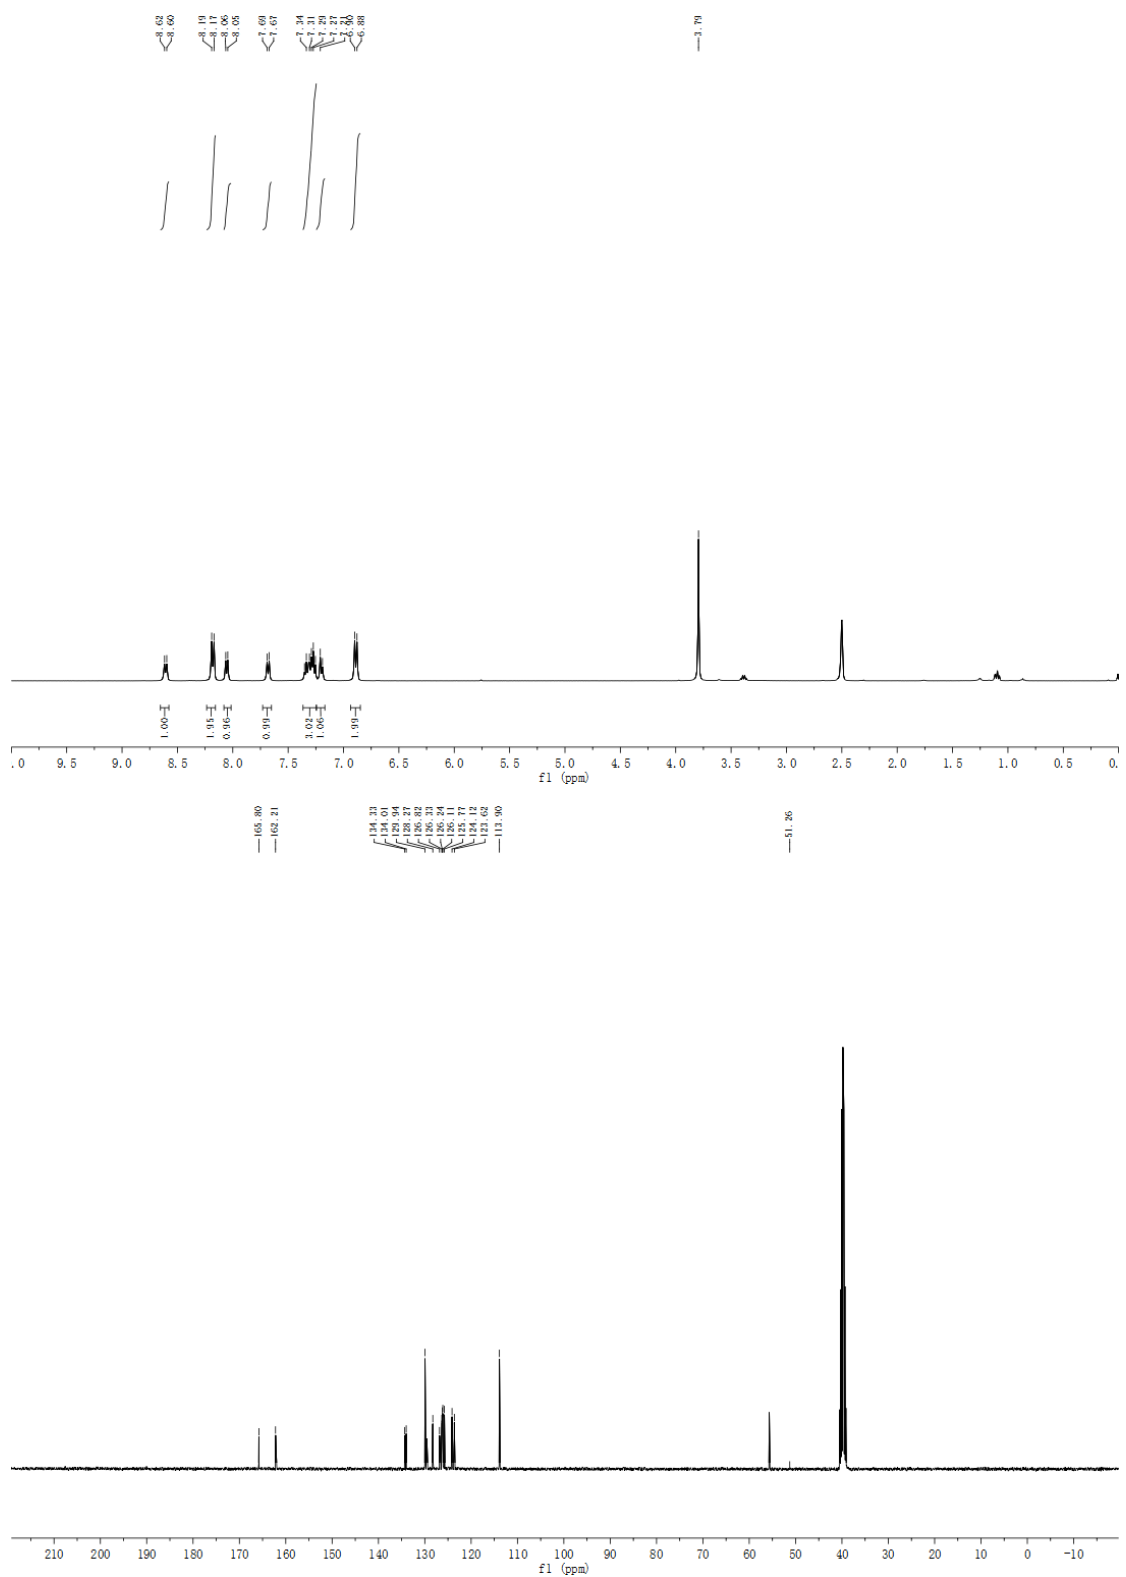

**Figure S6**  $^1\text{H}$  NMR and  $^{13}\text{C}$  NMR spectra of **K6** (recorded in  $d_6$ -DMSO)

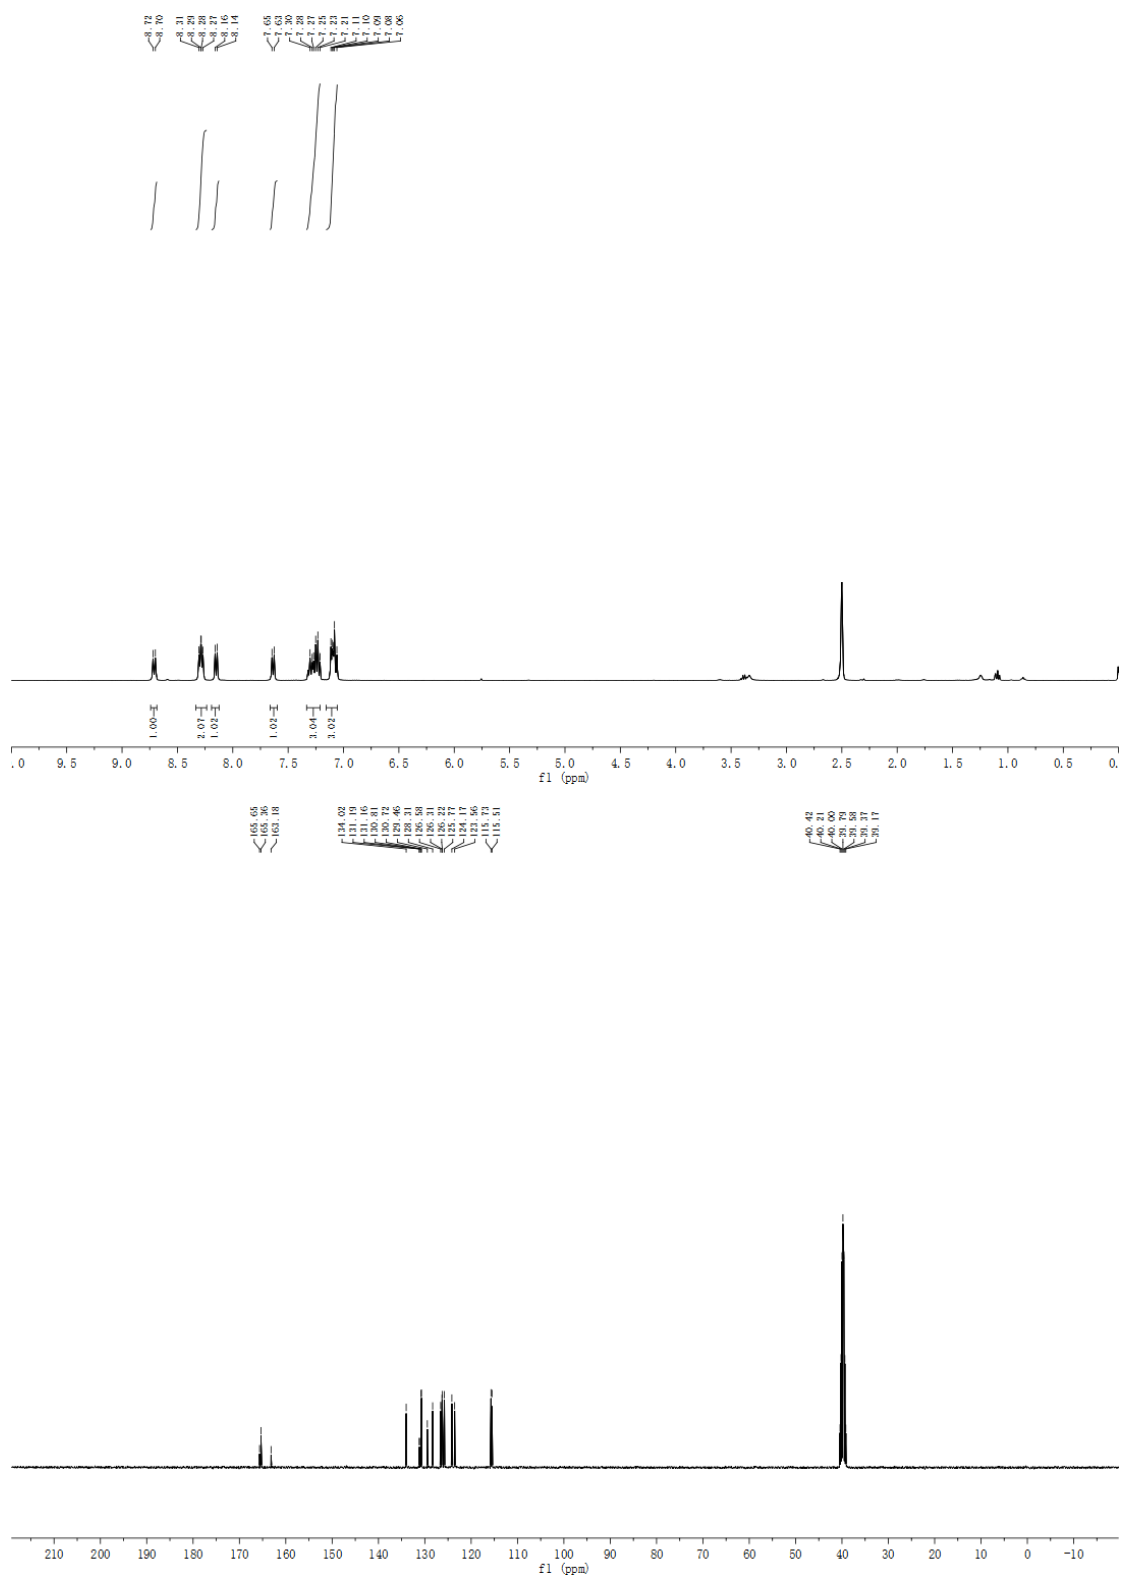

**Figure S7** <sup>1</sup>H NMR and <sup>13</sup>C NMR spectra of **K7** (recorded in *d*<sub>6</sub>-DMSO).

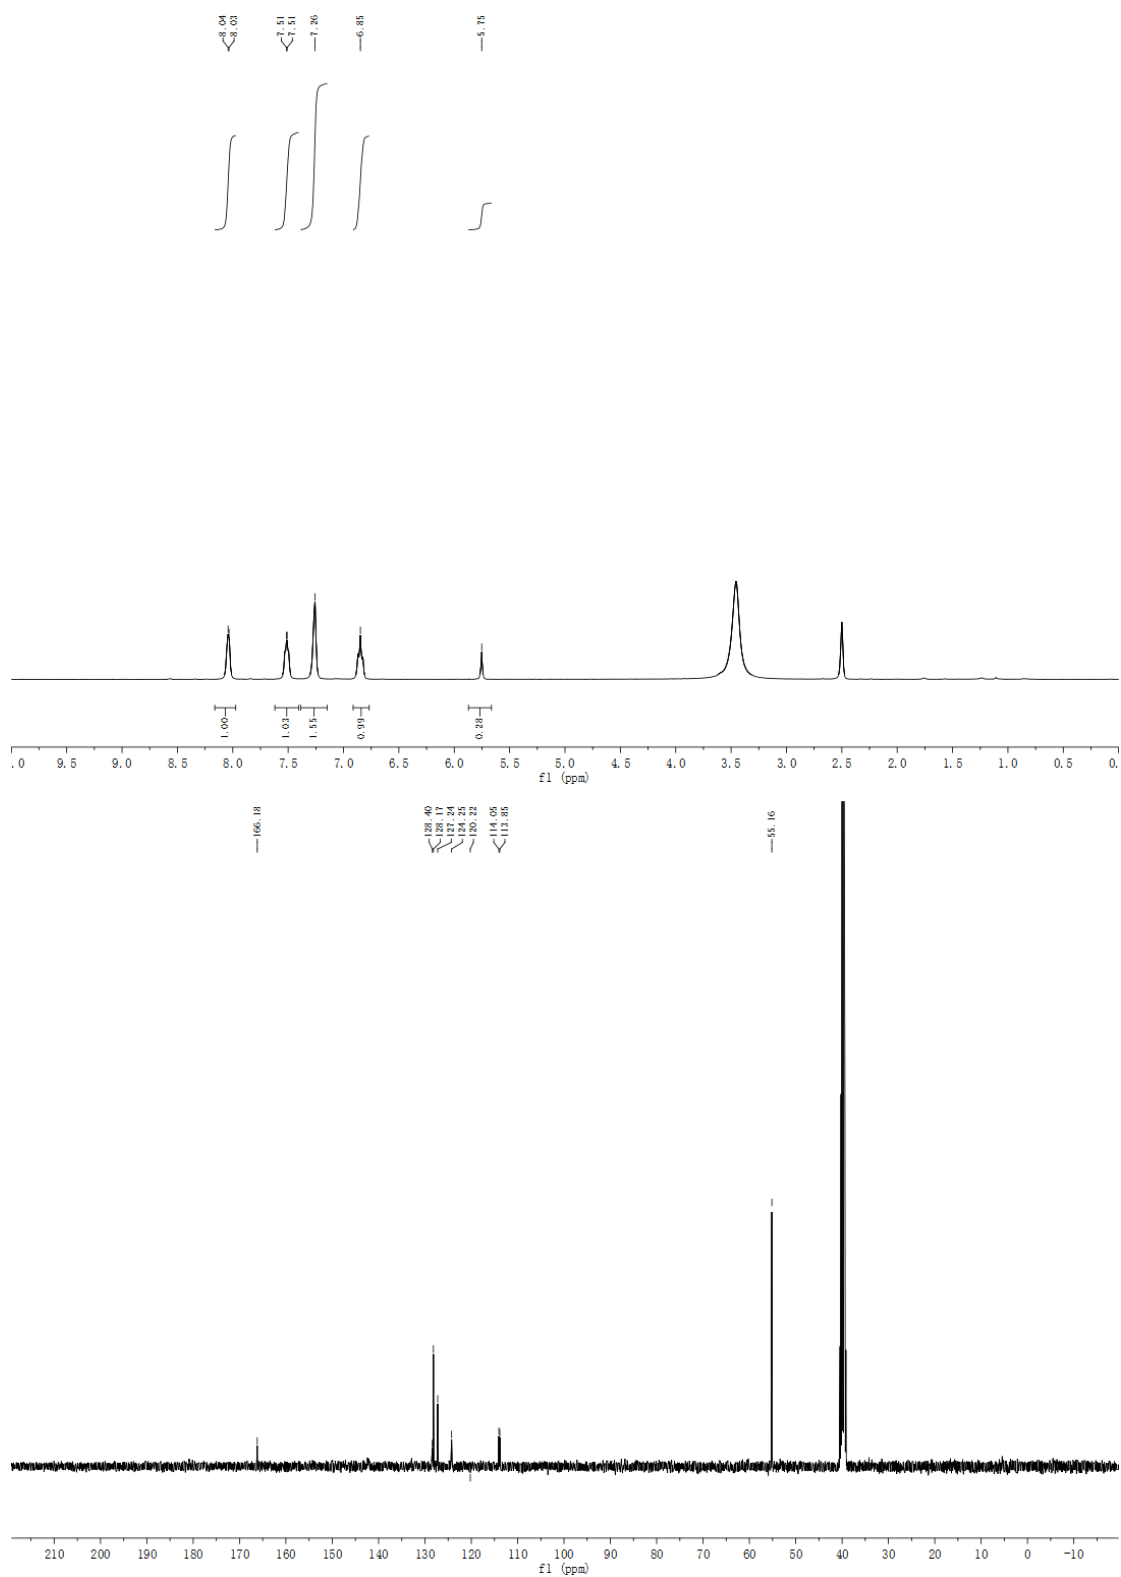

**Figure S8**  $^1\text{H}$  NMR and  $^{13}\text{C}$  NMR spectra of **K8** (recorded in  $d_6$ -DMSO).

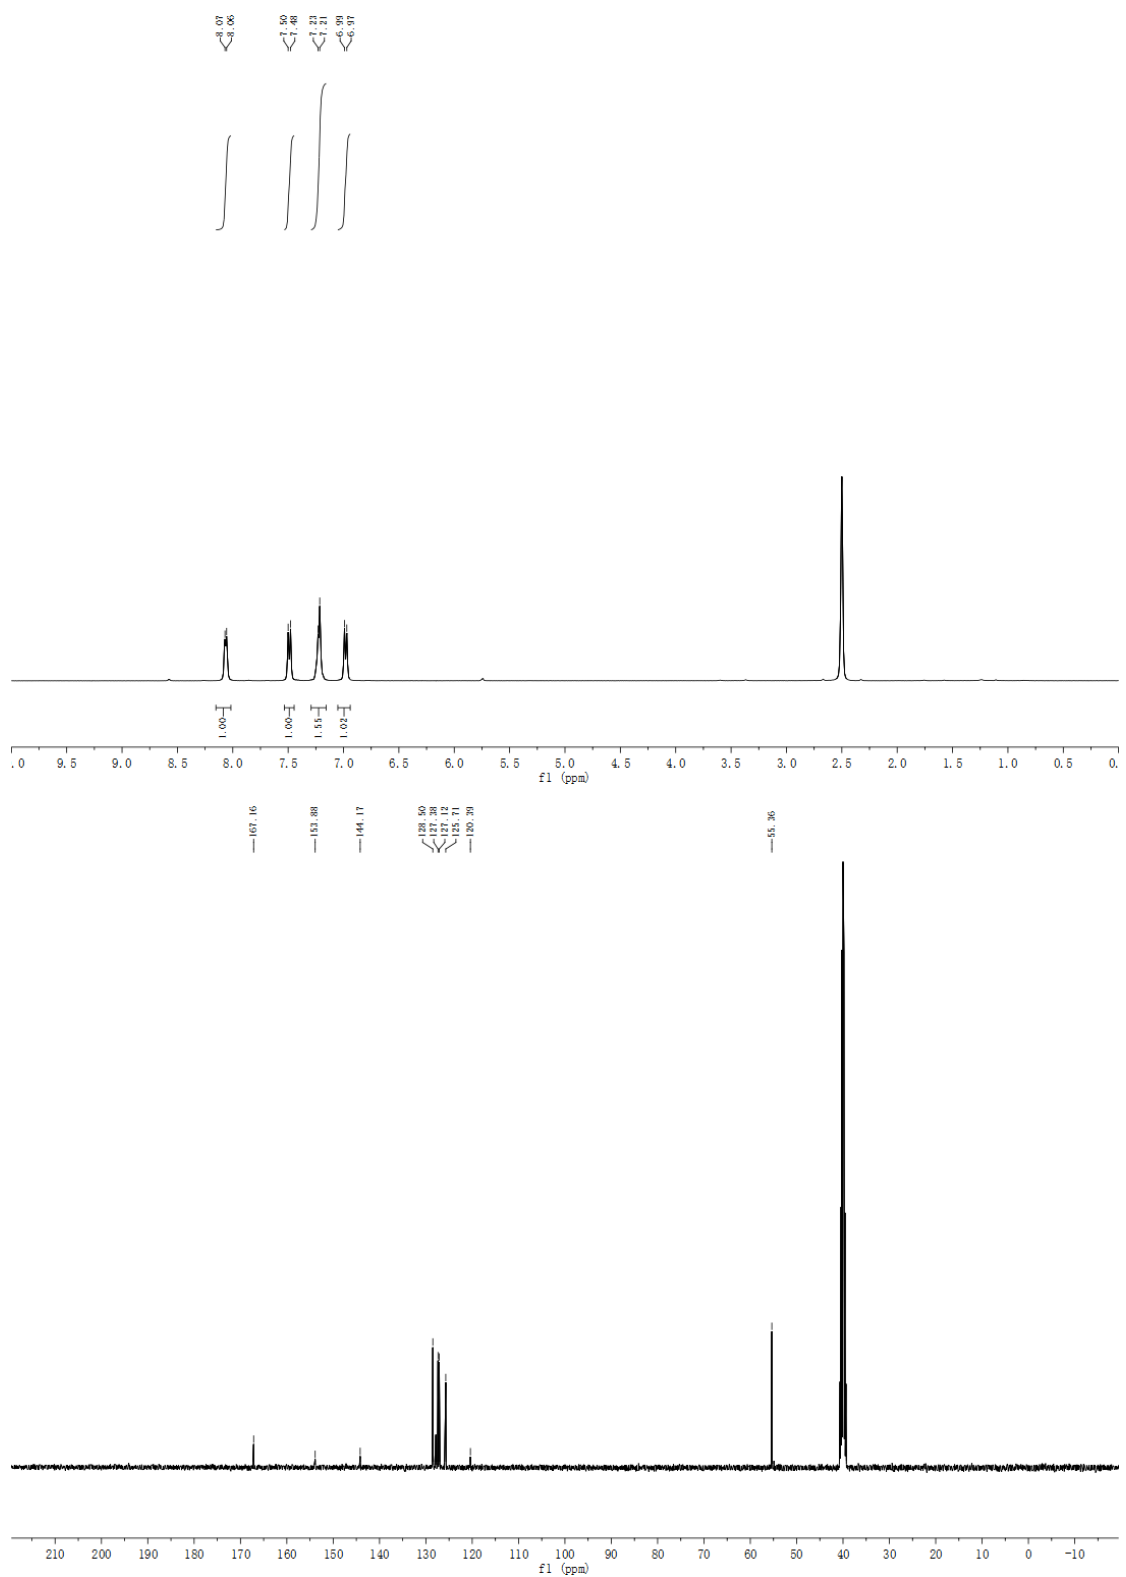

**Figure S9**  $^1\text{H}$  NMR and  $^{13}\text{C}$  NMR spectra of **K9** (recorded in  $d_6$ -DMSO).

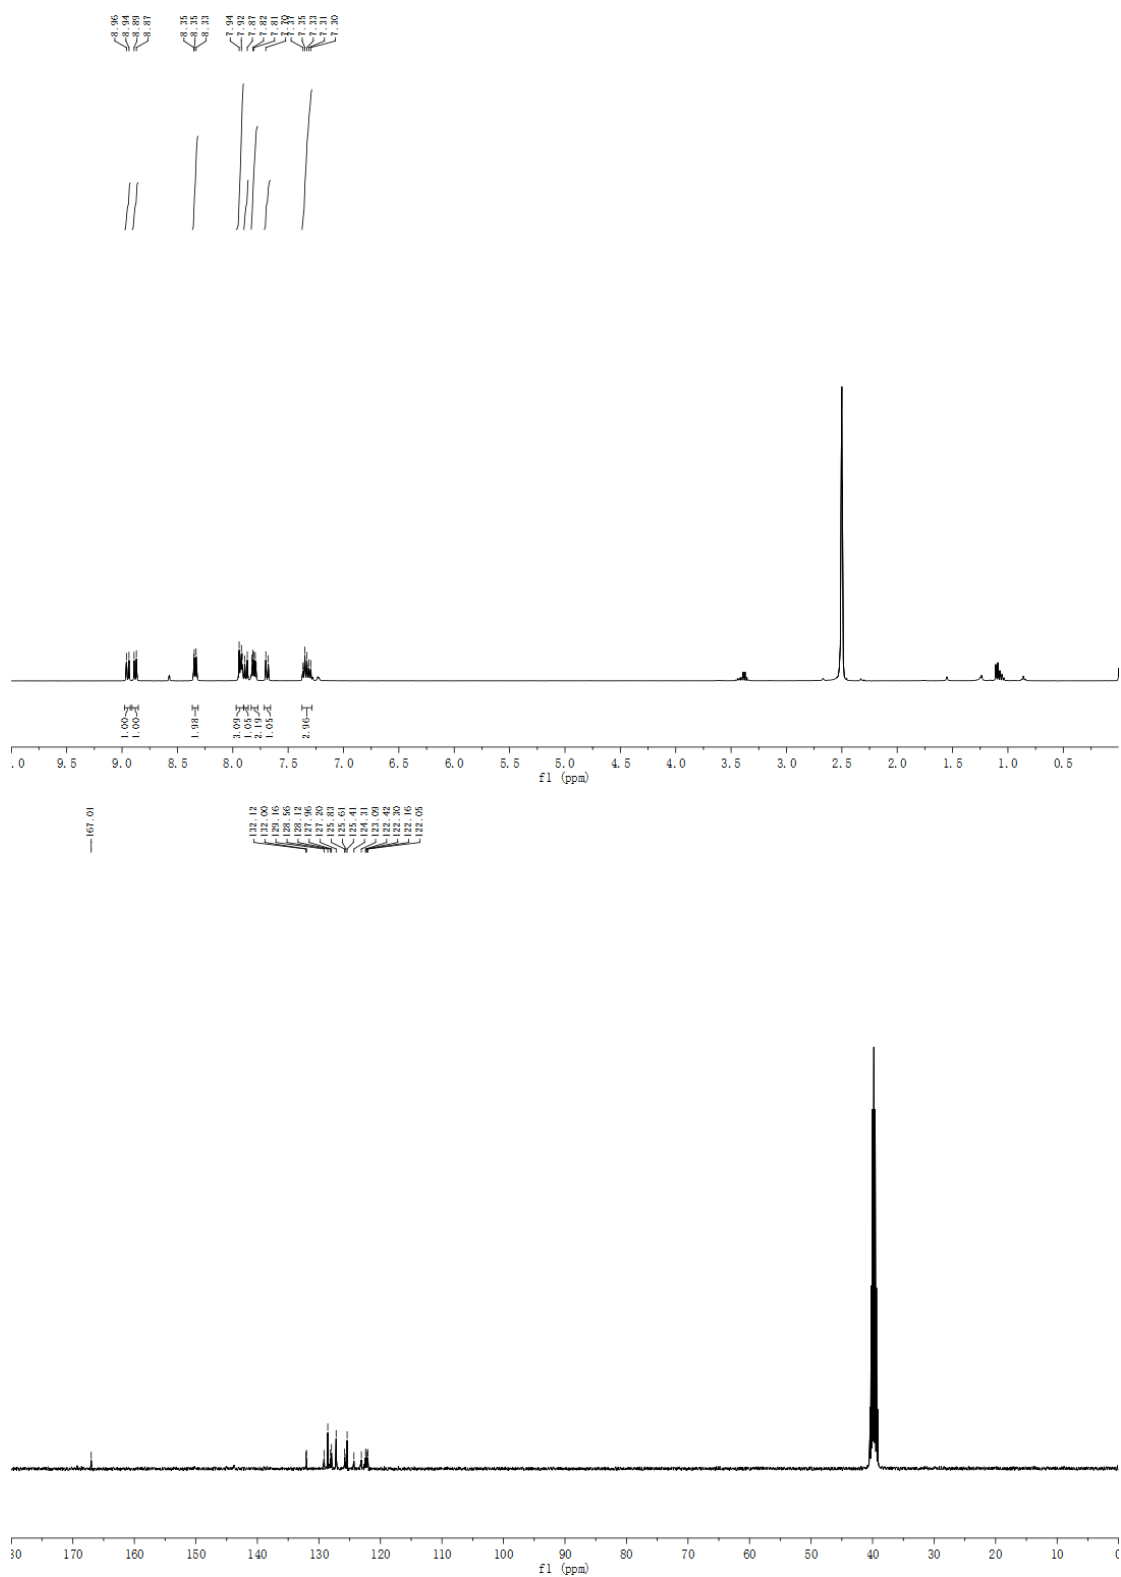

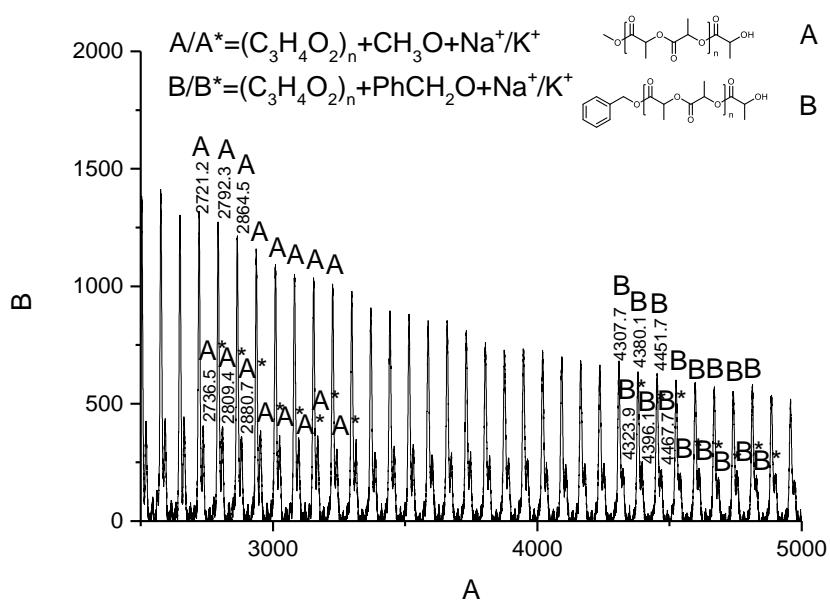

**Figure S11.** MOLDI-TOF spectrum of PLA obtained by **K2** and 1 equiv. of BnOH

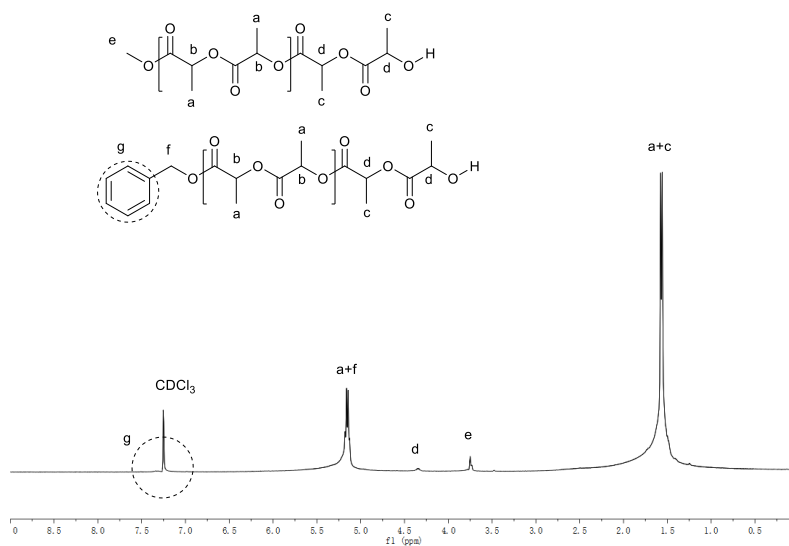

**Figure S12**  $^1H$  NMR spectra of obtained PLA by **K2** and 1 equiv. of BnOH

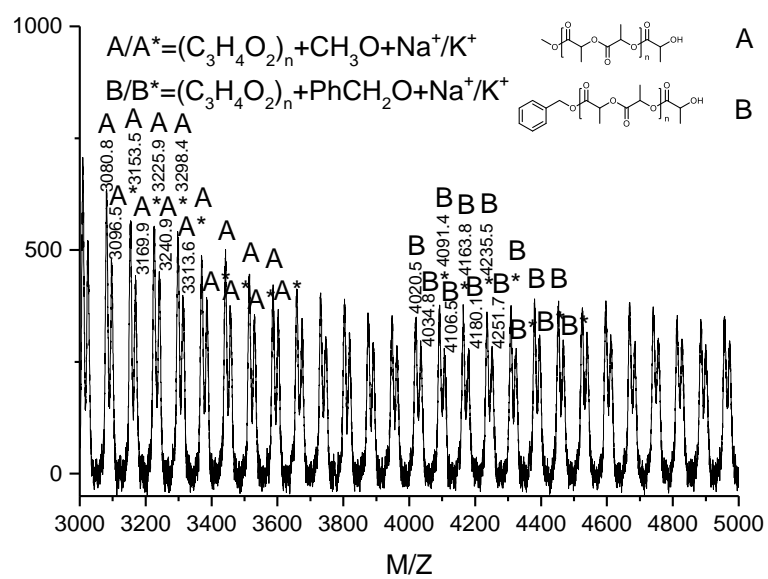

**Figure S13** MALDI-TOF spectrum of PLLA obtained by **K2** and 2 equiv. of BnOH

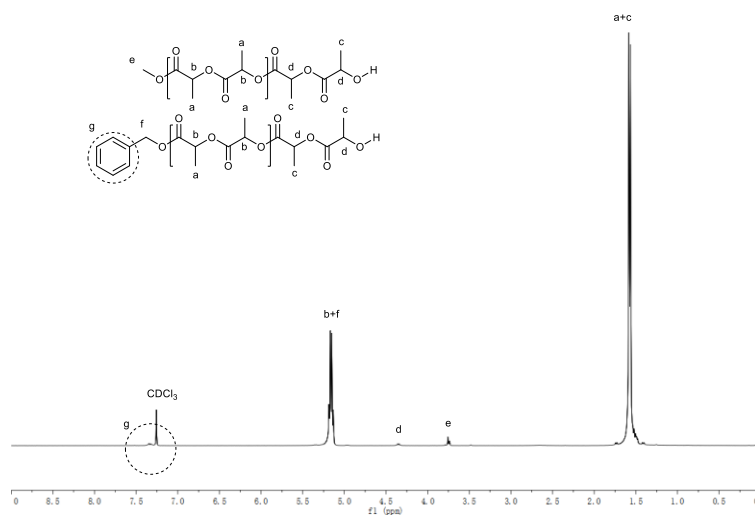

**Figure S14** <sup>1</sup>H NMR spectra of obtained PLA by **K2** and 2 equiv. of BnOH

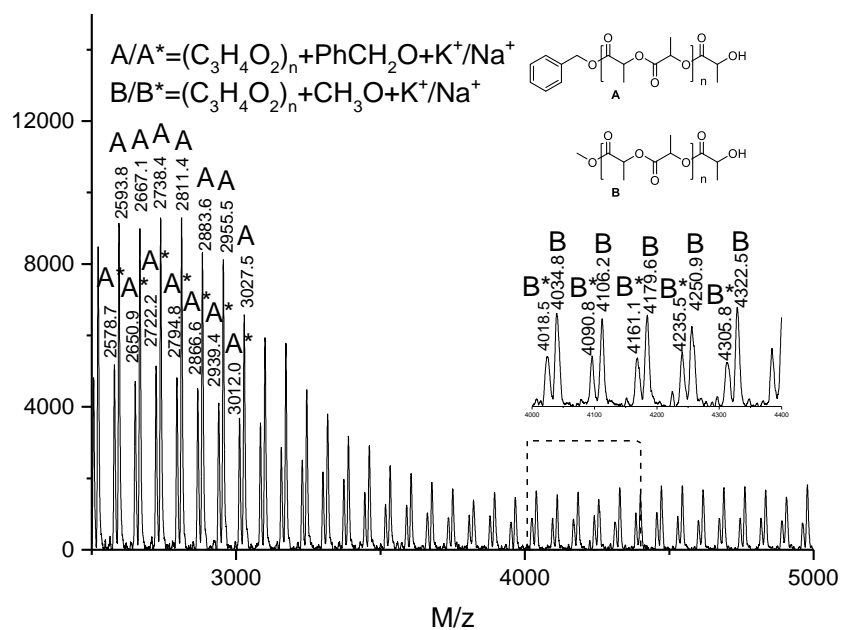

**Figure S15** MALDI-TOF spectrum of PLLA obtained by **K2** and 5 equiv. of BnOH

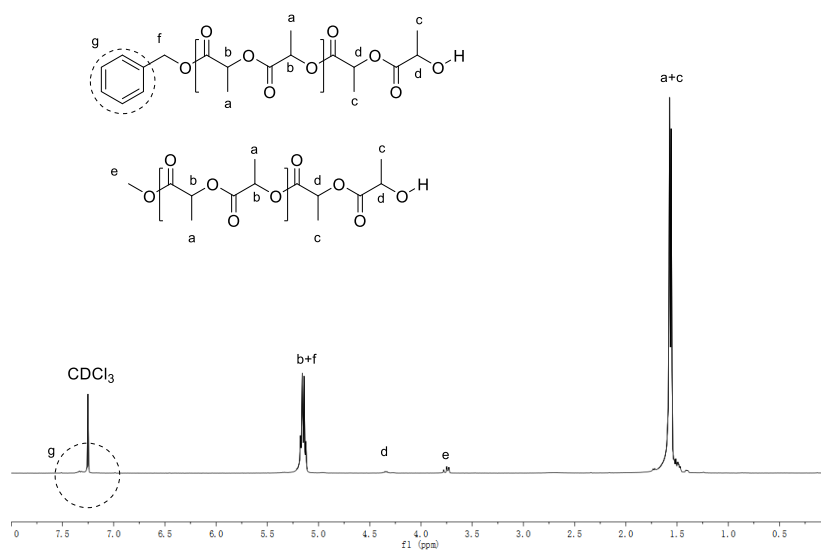

**Figure S16.** MOLDI-TOF spectrum of PLLA prepared by **K2** and 5equiv BnOH

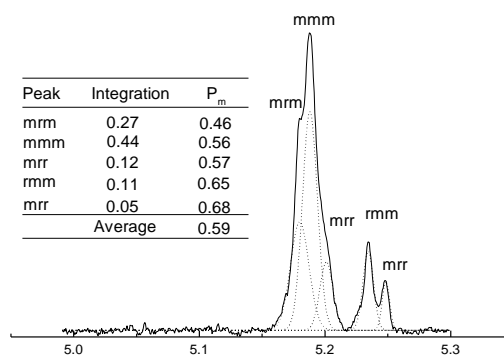

**Figure S17** Homonuclear-decoupled  $^1\text{H}$  NMR spectroscopy of *rac*-LA obtained by **K1** in 60 min

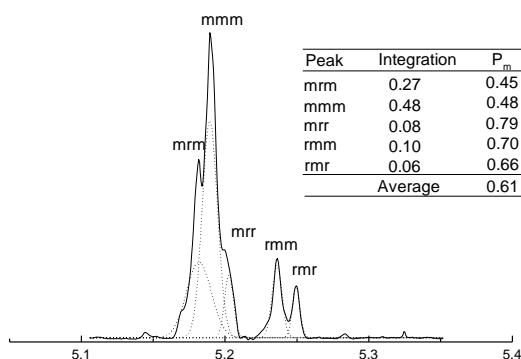

**Figure S18** Homonuclear-decoupled  $^1\text{H}$  NMR spectroscopy of *rac*-LA obtained by **K2** in 60 min

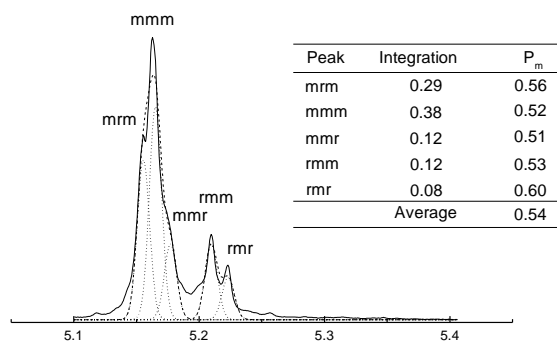

**Figure S19** Homonuclear-decoupled  $^1\text{H}$  NMR spectroscopy of *rac*-LA obtained by **K3** in 60 min

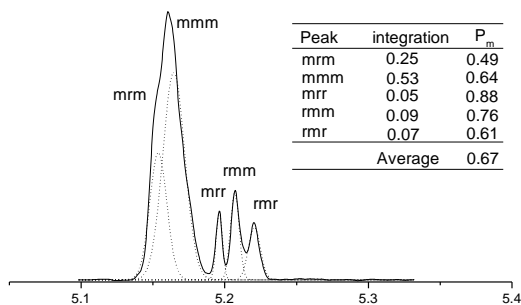

**Figure S20** Homonuclear-decoupled  $^1\text{H}$  NMR spectroscopy of *rac*-LA obtained by **K4** in 60 min

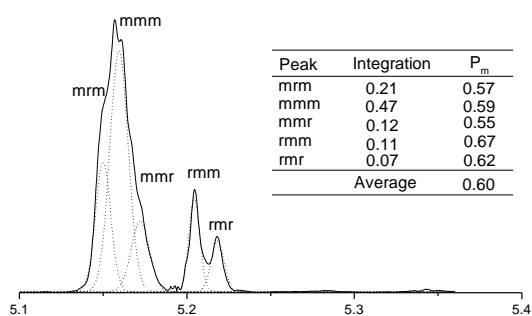

**Figure S21** Homonuclear-decoupled  $^1\text{H}$  NMR spectroscopy of *rac*-LA obtained by **K5** in 60 min

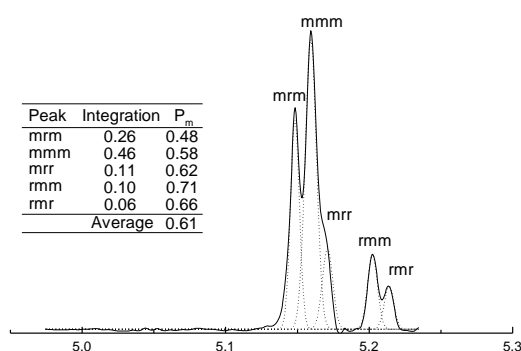

**Figure S22** Homonuclear-decoupled  $^1\text{H}$  NMR spectroscopy of *rac*-LA obtained by **K6** in 60 min

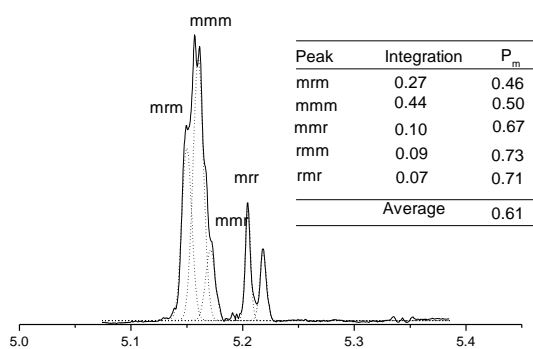

**Figure S23** Homonuclear-decoupled  $^1\text{H}$  NMR spectroscopy of *rac*-LA obtained by **K7** in 60 min

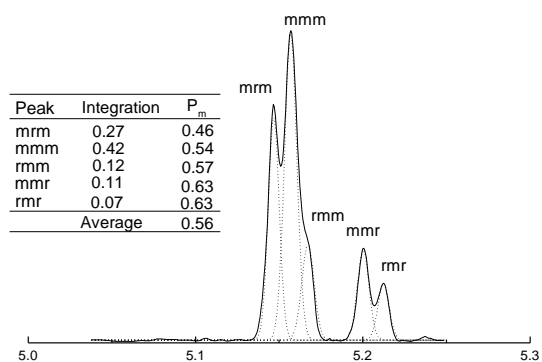

**Figure S24** Homonuclear-decoupled  $^1\text{H}$  NMR spectroscopy of *rac*-LA obtained by **K8** in 60 min

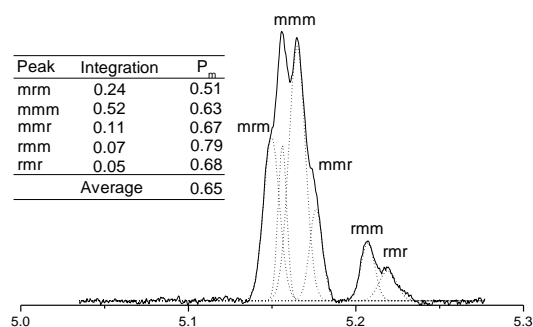

**Figure S25** Homonuclear-decoupled  $^1\text{H}$  NMR spectroscopy of *rac*-LA obtained by **K9** in 60 min

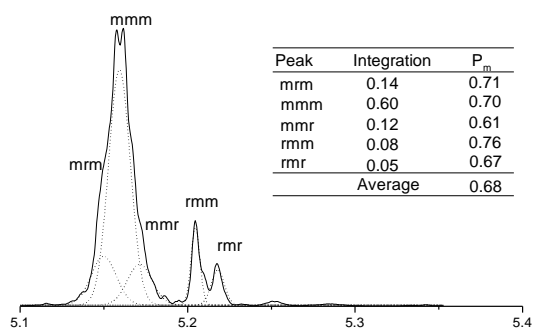

**Figure S26** Homonuclear-decoupled  $^1\text{H}$  NMR spectroscopy of *rac*-LA obtained by **K10** in 60 min

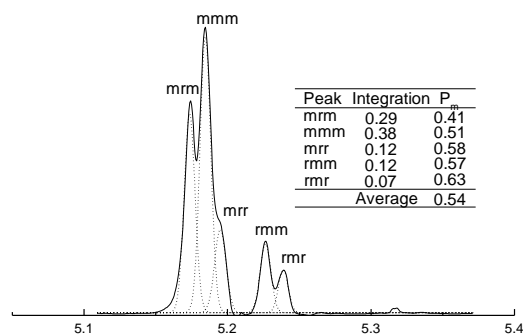

**Figure S27** Homonuclear-decoupled  $^1\text{H}$  NMR spectroscopy of *rac*-LA obtained by **K11** in 60 min

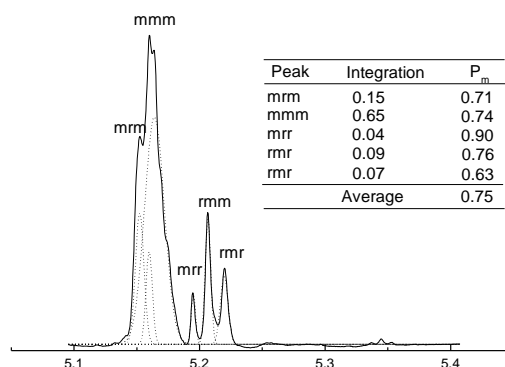

**Figure S28** Homonuclear-decoupled  $^1\text{H}$  NMR spectroscopy of *rac*-LA obtained by **K2** within 10 min

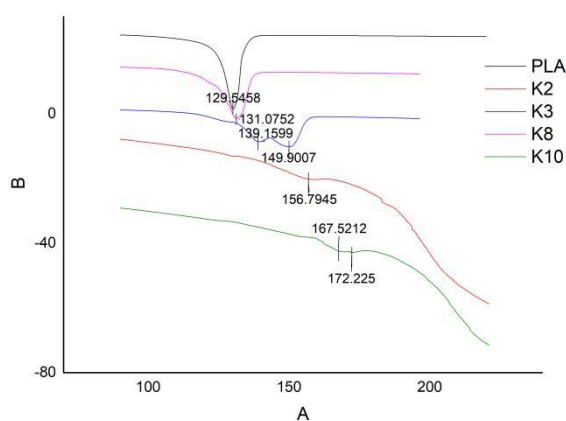

**Figure S29.** Comparing the  $T_m$  by using different catalysts (run 2, 3, 8, 10, Table 4; PLA was the polymer which catalytic with L-LA by K2, run 5, Table 2)

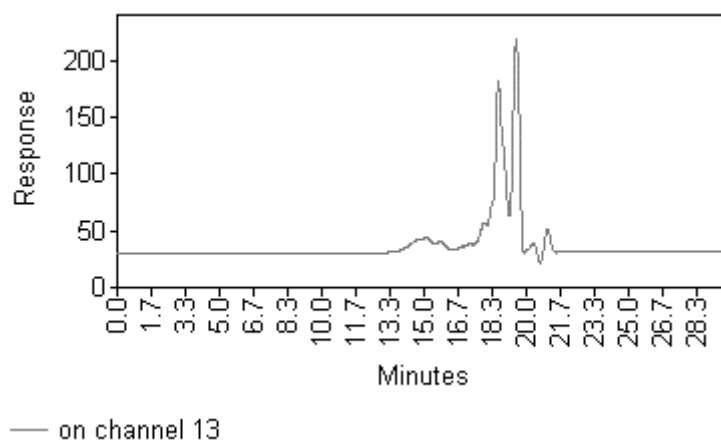

**Figure S30.** GPC curves of the PLLA produced using **K2** (runs 9, Table 2)

**Table S1.** Crystallographic data and refinement details for **K2** and **K10**

| Identification code                               | <b>K2</b>                                                   | <b>K10</b>                                                                   |
|---------------------------------------------------|-------------------------------------------------------------|------------------------------------------------------------------------------|
| Empirical formula                                 | BrC <sub>17</sub> KNO                                       | C <sub>46</sub> H <sub>28</sub> K <sub>2</sub> N <sub>2</sub> O <sub>2</sub> |
| Formula weight                                    | 353.19                                                      | 718.90                                                                       |
| Temperature/K                                     | 170.00(10)                                                  | 169.99(14)                                                                   |
| Crystal system                                    | orthorhombic                                                | monoclinic                                                                   |
| Space group                                       | Pbca                                                        | P2 <sub>1</sub> /c                                                           |
| a/Å                                               | 11.80430(10)                                                | 28.2391(6)                                                                   |
| b/Å                                               | 11.04670(10)                                                | 11.9423(3)                                                                   |
| c/Å                                               | 22.6296(2)                                                  | 10.6840(3)                                                                   |
| $\alpha/^\circ$                                   | 90                                                          | 90                                                                           |
| $\beta/^\circ$                                    | 90                                                          | 98.068(2)                                                                    |
| $\gamma/^\circ$                                   | 90                                                          | 90                                                                           |
| Volume/Å <sup>3</sup>                             | 2950.87(4)                                                  | 3567.41(16)                                                                  |
| Z                                                 | 8                                                           | 4                                                                            |
| $\rho_{\text{calc}}/\text{cm}^3$                  | 1.590                                                       | 1.339                                                                        |
| $\mu/\text{mm}^{-1}$                              | 6.291                                                       | 2.681                                                                        |
| F(000)                                            | 1368.0                                                      | 1488.0                                                                       |
| Crystal size/mm <sup>3</sup>                      | 0.25 × 0.15 ×<br>0.05                                       | 0.1 × 0.08 ×<br>0.005                                                        |
| Radiation                                         | CuK $\alpha$<br>( $\lambda = 1.54184$ )                     | CuK $\alpha$<br>( $\lambda = 1.54184$ )                                      |
| 2 $\Theta$ range for data<br>collection/ $^\circ$ | 7.814 to<br>150.308                                         | 6.322 to<br>151.232                                                          |
| Index ranges                                      | -11 ≤ h ≤ 14,<br>-13 ≤ k ≤ 13,<br>-28 ≤ l ≤ 26              | -26 ≤ h ≤ 34,<br>-14 ≤ k ≤ 14,<br>-13 ≤ l ≤ 13                               |
| Reflections collected                             | 10706<br>2943                                               | 24756<br>6838                                                                |
| Independent reflections                           | [R <sub>int</sub> = 0.0338,<br>R <sub>sigma</sub> = 0.0285] | [R <sub>int</sub> = 0.0511,<br>R <sub>sigma</sub> = 0.0463]                  |
| Data/restraints/parameters                        | 2943/0/190                                                  | 6838/0/469                                                                   |
| Goodness-of-fit on F <sup>2</sup>                 | 1.080                                                       | 1.293                                                                        |
| Final R indexes [I ≥ 2 $\sigma$ (I)]              | R <sub>1</sub> = 0.0440,<br>wR <sub>2</sub> = 0.1348        | R <sub>1</sub> = 0.1087,<br>wR <sub>2</sub> = 0.3039                         |
| Final R indexes [all data]                        | R <sub>1</sub> = 0.0466,<br>wR <sub>2</sub> = 0.1371        | R <sub>1</sub> = 0.1281,<br>wR <sub>2</sub> = 0.3224                         |
| Largest diff. peak/hole / e<br>Å <sup>-3</sup>    | 0.85/-0.66                                                  | 1.72/-0.61                                                                   |
